# Supplementary material for: Protocol for an interdisciplinary cross-sectional study investigating the social, biological and community-level drivers of antimicrobial resistance (AMR): Holistic Approach to Unravel Antibacterial Resistance in East Africa (HATUA)
Source: PubMed Central journal article supplement (PMC7942251; doi:10.1136/bmjopen-2020-041418), 2021-03-08
Supplement: bmjopen-2020-041418supp001.pdf [file bmjopen-2020-041418supp001.pdf]

**Appendix A. Data summary of HATUA Pilot data relating to patient recruitment****Table A1: Summary of socio-demographic characteristics of patients recruited in Mbarara district, Uganda.**

|                                                                                    | N  | %    |
|------------------------------------------------------------------------------------|----|------|
| <b>Gender</b>                                                                      |    |      |
| Male                                                                               | 38 | 29.5 |
| Female                                                                             | 91 | 70.5 |
| Missing                                                                            | 0  | 0    |
| <b>Age</b>                                                                         |    |      |
| Less than 18                                                                       | 14 | 10.9 |
| 18-34                                                                              | 57 | 44.2 |
| 35-54                                                                              | 47 | 36.4 |
| 55 and over                                                                        | 9  | 7.0  |
| Missing                                                                            | 2  | 1.5  |
| <b>Education</b>                                                                   |    |      |
| None                                                                               | 30 | 23.2 |
| Primary                                                                            | 79 | 61.3 |
| Secondary                                                                          | 14 | 10.9 |
| Tertiary                                                                           | 4  | 3.1  |
| Missing                                                                            | 2  | 1.5  |
| <b>Taken medication in the past 6 months</b>                                       |    |      |
| No                                                                                 | 38 | 29.5 |
| Yes                                                                                | 72 | 55.8 |
| Missing                                                                            | 19 | 14.7 |
| <b>Of those who did, where obtained medication from (multiple choice possible)</b> |    |      |
| Clinic/ health centre                                                              | 67 | 93.0 |
| Drug seller                                                                        | 13 | 18.0 |

**Appendix B. Agreed set of clinically relevant ABs for AST**

| <b>AB Class</b>                             | <b>Generic Name</b>     |
|---------------------------------------------|-------------------------|
| Penicillins + $\beta$ -lactamase inhibitors | Amoxicillin/clavulanate |
| Anti-staphylococcal $\beta$ -lactams        | Cefoxitin               |
| ESBL Cephalosporins                         | Ceftazidime             |
| ESBL Cephalosporins                         | Ceftriaxone             |
| Fluoroquinolones                            | Ciprofloxacin           |
| Macrolides                                  | Erythromycin            |
| Aminoglycosides                             | Gentamycin              |
| Oxazolidinones                              | Linezolid               |
| Quinolone                                   | Nalidixic Acid          |
| Nitrofurantoin                              | Nitrofurantoin          |
| Folate pathway inhibitors                   | Sulfamethoxazole        |
| Tetracycline                                | Tetracycline            |
| Folate pathway inhibitors                   | Trimethoprim            |
| Glycopeptides                               | Vancomycin              |
